# Supplementary material for: A latent transfer learning method for estimating hospital-specific post-acute healthcare demands following SARS-CoV-2 infection
Source: PubMed Central journal article supplement — Patterns (N Y). 2024 Oct 24;5(11):101079. doi: 10.1016/j.patter.2024.101079 (PMC11573960; doi:10.1016/j.patter.2024.101079), 2024-10-24
Supplement: mmc1.pdf [file mmc1.pdf]

**Patterns, Volume 5**

**Supplemental information**

**A latent transfer learning method for estimating  
hospital-specific post-acute healthcare  
demands following SARS-CoV-2 infection**

**Qiong Wu, Nathan M. Pajor, Yiwen Lu, Charles J. Wolock, Jiayi Tong, Vitaly Lorman, Kevin B. Johnson, Jason H. Moore, Christopher B. Forrest, David A. Asch, and Yong Chen**

# Supplemental Information

## Table of Contents

|                                                                           |           |
|---------------------------------------------------------------------------|-----------|
| <b>Supplemental Experimental Procedure .....</b>                          | <b>2</b>  |
| <i>A. Benchmarks.....</i>                                                 | <i>2</i>  |
| <i>B. Definitions of study variables.....</i>                             | <i>2</i>  |
| <i>C. Population selection workflow .....</i>                             | <i>5</i>  |
| <b>Note S1 Additional Population Statistics.....</b>                      | <b>6</b>  |
| <b>Note S2 Characterization of Patient Subpopulations.....</b>            | <b>10</b> |
| <b>Note S3 Causal Estimation of Baseline Healthcare Utilizations.....</b> | <b>12</b> |
| <b>Note S4 Negative Control Experiments.....</b>                          | <b>13</b> |

## Supplemental Experimental Procedure

### A. Benchmarks

Traditionally, the estimation of the average treatment effect can be assessed by following the causal inference framework in a conventional single-site setting where only target samples were available. For simplicity, we let  $i = 1, \dots, n_0$  indicate subjects in the target hospital. In practical applications, the correct specification of an outcome model or a propensity score model (the model predicting the treatment assignment based on patient covariates) needs adequate background knowledge which is typically lacking. The Augmented Inverse Propensity Weighted (AIPW) estimator is a combination of two models, offering improved robustness. The AIPW estimator is doubly robust in the sense that when either the outcome model or the propensity score model is correctly specified, it produces a consistent estimator of average treatment effect<sup>1</sup>. Specifically, we consider a parametric model  $g_c(a, x_i; \theta_{c,a})$  for the conditional expectation of outcome in each treatment group of  $c$ -th subpopulation. The probability of treatment assignment in the  $c$ -th subpopulation follows  $P(A_i = 1|x_i) = e_c(x_i; \beta_c)$ .  $\hat{\theta}_{c,a}$  and  $\hat{\beta}_c$  denote corresponding estimated parameters. Then, the AIPW estimator is defined as

$$\hat{\Delta}_c = \frac{1}{n_{0c}} \sum_{i=1}^{n_0} \left[ g_c(1, x_i; \hat{\theta}_{c,1}) - g_c(0, x_i; \hat{\theta}_{c,0}) + \frac{A_i \{Y_i - g_c(1, x_i; \hat{\theta}_{c,1})\}}{e_c(x_i; \hat{\beta}_c)} - \frac{(1 - A_i) \{Y_i - g_c(0, x_i; \hat{\theta}_{c,0})\}}{1 - e_c(x_i; \hat{\beta}_c)} \right] I(G_i = c),$$

where  $n_{0c} = \sum_{i=1}^{n_0} I(G_i = c)$  be the number of samples from  $c$ -th subpopulation. To construct a confidence interval for the AIPW estimator, either the sandwich estimator<sup>2</sup> or non-parametric bootstrap can be utilized for the sampling variance of  $\hat{\Delta}_c$ .

### B. Definitions of study variables

**Table S1: Variables used in estimating the subpopulation-specific impacts of COVID-19 on healthcare utility in each hospital of PEDSnet network through the Latent-TL pipeline.**

| Variable       | Functional form | Values                                                                | Detail                                      | Codes/references                                            |
|----------------|-----------------|-----------------------------------------------------------------------|---------------------------------------------|-------------------------------------------------------------|
| Age (years)    | Linear          | NA                                                                    | Based on records in the person domain.      | Age is defined as the integer of (date – birth date)/365.25 |
| Sex            | Indicator       | Male/Female                                                           | Based on records in the person domain.      | NA                                                          |
| Race/Ethnicity | 4 categories    | Non-Hispanic White<br>Non-Hispanic Black<br>Hispanic<br>Other/unknown | Based on records in the person domain.      | NA                                                          |
| Obesity        | Indicator       | Yes/No                                                                | Based on records in the measurement domain. | NA                                                          |

|                                                                                            |              |                               |                                                                                                                                                                                                                                                                                                                                                                                    |                                                                                                                                                                                                                                                                                                          |
|--------------------------------------------------------------------------------------------|--------------|-------------------------------|------------------------------------------------------------------------------------------------------------------------------------------------------------------------------------------------------------------------------------------------------------------------------------------------------------------------------------------------------------------------------------|----------------------------------------------------------------------------------------------------------------------------------------------------------------------------------------------------------------------------------------------------------------------------------------------------------|
|                                                                                            |              |                               | <p>If measured at age &lt; 24*30.5 days, NHANES weight z score &gt; 1.64</p> <p>If measured at 24*30.5 &lt; age &lt; 240*30.5, NHANES BMI z score &gt; 1.64</p> <p>If measured at age &gt;= 240*30.5, BMI kg/m2 &gt; 30</p>                                                                                                                                                        |                                                                                                                                                                                                                                                                                                          |
| <b>Baseline visits per year (averaged during 3 years to 7 days prior to the entry)</b>     | Linear       | NA                            | Based on the condition occurrence and visit occurrence domains.                                                                                                                                                                                                                                                                                                                    | NA                                                                                                                                                                                                                                                                                                       |
| <b>Diagnosis of each chronic condition cluster in 3 years to 7 days prior to the entry</b> | Indicator    | Yes/No                        | 205 chronic condition clusters were defined based on the condition occurrence and visit occurrence domains. Chronic condition clusters with no observed events were removed in the analysis, which leads to 199 variables                                                                                                                                                          | Rao, S., Lee, G. M., Razzaghi, H., Lorman, V., Mejias, A., Pajor, N. M., ... & Forrest, C. B. (2022). Clinical features and burden of post-acute sequelae of SARS-CoV-2 infection in children and adolescents: an exploratory EHR-based cohort study from the RECOVER program. <i>medRxiv</i> , 2022-05. |
| <b>Documented infection</b>                                                                | Indicator    | Yes/No                        | Based on the observation and visit occurrence domains. Defined as a polymerase-chain-reaction (PCR), serology, or antigen tests positive for COVID-19 in an inpatient or emergency department (ED) encounter, or diagnoses of COVID-19, post-acute sequelae of SARS-CoV-2 (PASC), or multisystem inflammatory syndrome in children (MIS-C) regardless of the presence of symptoms. | See <a href="https://github.com/PEDSnet/PASC/tree/main/observation_derivation_recover_ml_phenotype/specs">https://github.com/PEDSnet/PASC/tree/main/observation_derivation_recover_ml_phenotype/specs</a> for detailed codes.                                                                            |
| <b>Test location</b>                                                                       | 3 categories | ED<br>Inpatient<br>Outpatient | Based on the observation and visit occurrence domains.                                                                                                                                                                                                                                                                                                                             | NA                                                                                                                                                                                                                                                                                                       |
| <b>Any inpatient visit 28-179 days after the entry</b>                                     | Indicator    | Yes/No                        | Based on the condition occurrence and visit occurrence domains. Including inpatient hospital stay, emergency department admit to                                                                                                                                                                                                                                                   | NA                                                                                                                                                                                                                                                                                                       |

|                                                 |           |        | inpatient hospital stay, and administrative visit.              |    |
|-------------------------------------------------|-----------|--------|-----------------------------------------------------------------|----|
| <b>Any ED visit 28-179 days after the entry</b> | Indicator | Yes/No | Based on the condition occurrence and visit occurrence domains. | NA |

Note: All of the domains in the table above are based on the PEDSnet common data model (CDM). More details are available through this link: <https://data-models-service.research.chop.edu>.

## C. Population selection workflow

**Figure S1: Selection workflow of the study population based on PEDSnet COVID-19 Database Version 2024-03-14. Note that the population selection is based on a more recent version of the database than the one used in the original manuscript. Hence, the numbers may differ slightly due to updates in the COVID-19 data submitted by each hospital.**

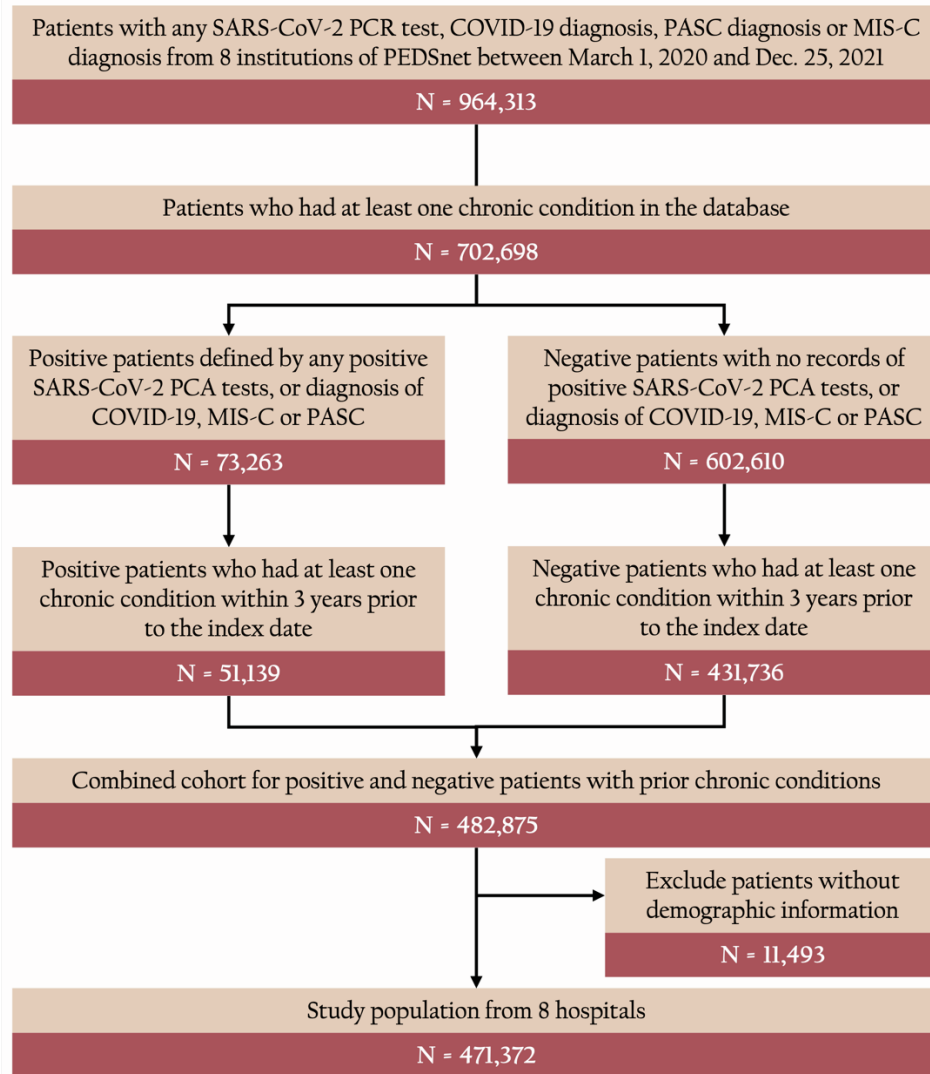

## Note S1 Additional Population Statistics

**Table S2. Distribution of pre-existing chronic conditions of patients < 21 years of age in the COVID-19 infection, no COVID-19 infection and overall cohorts.**

| Condition                                                | COVID-19 Infection (N=49,430) | No COVID-19 Infection (N=382,735) | Overall (N=432,165) |
|----------------------------------------------------------|-------------------------------|-----------------------------------|---------------------|
| Academic developmental disorder                          | 2,205 (0.045%)                | 16,259 (0.042%)                   | 18,464 (0.043%)     |
| Acquired foot deformities                                | 3,229 (0.065%)                | 25,030 (0.065%)                   | 28,259 (0.065%)     |
| Allergies                                                | 13,912 (0.281%)               | 89,489 (0.234%)                   | 103,401 (0.239%)    |
| Anxiety disorder                                         | 5,400 (0.109%)                | 35,444 (0.093%)                   | 40,844 (0.095%)     |
| Aplastic anemia                                          | 1,739 (0.035%)                | 11,808 (0.031%)                   | 13,547 (0.031%)     |
| Arrhythmias                                              | 1,093 (0.022%)                | 8,838 (0.023%)                    | 9,931 (0.023%)      |
| Asthma                                                   | 9,158 (0.185%)                | 56,659 (0.148%)                   | 65,817 (0.152%)     |
| Attention deficit hyperactivity disorder                 | 2,925 (0.059%)                | 18,462 (0.048%)                   | 21,387 (0.049%)     |
| Autism spectrum disorder                                 | 1,753 (0.035%)                | 15,731 (0.041%)                   | 17,484 (0.040%)     |
| Autoimmune thyroiditis                                   | 179 (0.004%)                  | 1,337 (0.003%)                    | 1,516 (0.004%)      |
| Bipolar disorder                                         | 148 (0.003%)                  | 1,085 (0.003%)                    | 1,233 (0.003%)      |
| Blindness and vision defects                             | 2,588 (0.052%)                | 19,150 (0.050%)                   | 21,738 (0.050%)     |
| Cancer treatment                                         | 528 (0.011%)                  | 3,292 (0.009%)                    | 3,820 (0.009%)      |
| Cannabis related disorders                               | 306 (0.006%)                  | 1,843 (0.005%)                    | 2,149 (0.005%)      |
| Cardiac and circulatory congenital anomalies             | 2,585 (0.052%)                | 24,353 (0.064%)                   | 26,938 (0.062%)     |
| Cardiomyopathy                                           | 197 (0.004%)                  | 1,522 (0.004%)                    | 1,719 (0.004%)      |
| Cataract and other lens disorders                        | 111 (0.002%)                  | 1,127 (0.003%)                    | 1,238 (0.003%)      |
| Celiac disease                                           | 198 (0.004%)                  | 1,681 (0.004%)                    | 1,879 (0.004%)      |
| Cerebral palsy                                           | 735 (0.015%)                  | 5,945 (0.016%)                    | 6,680 (0.015%)      |
| Cerebrovascular disease                                  | 413 (0.008%)                  | 3,370 (0.009%)                    | 3,783 (0.009%)      |
| Chromosomal abnormalities                                | 1,123 (0.023%)                | 10,072 (0.026%)                   | 11,195 (0.026%)     |
| Chronic kidney disease                                   | 406 (0.008%)                  | 2,813 (0.007%)                    | 3,219 (0.007%)      |
| Chronic obstructive pulmonary disease and bronchiectasis | 193 (0.004%)                  | 1,408 (0.004%)                    | 1,601 (0.004%)      |
| Cleft lip or palate                                      | 303 (0.006%)                  | 3,679 (0.010%)                    | 3,982 (0.009%)      |
| Coagulation and hemorrhagic disorders                    | 974 (0.020%)                  | 6,320 (0.017%)                    | 7,294 (0.017%)      |
| Cognitive impairment                                     | 2,255 (0.046%)                | 16,885 (0.044%)                   | 19,140 (0.044%)     |
| Communication and motor disorders                        | 4,451 (0.090%)                | 38,020 (0.099%)                   | 42,471 (0.098%)     |
| Conduct disorder                                         | 1,539 (0.031%)                | 10,327 (0.027%)                   | 11,866 (0.027%)     |
| Congenital malformations of eye, ear, face, neck         | 1,119 (0.023%)                | 10,546 (0.028%)                   | 11,665 (0.027%)     |
| Cornea and external disease                              | 5,082 (0.103%)                | 35,255 (0.092%)                   | 40,337 (0.093%)     |
| Depressive disorders                                     | 321 (0.006%)                  | 1,994 (0.005%)                    | 2,315 (0.005%)      |
| Developmental delay                                      | 1,791 (0.036%)                | 15,049 (0.039%)                   | 16,840 (0.039%)     |
| Diabetes mellitus type 1                                 | 543 (0.011%)                  | 3,027 (0.008%)                    | 3,570 (0.008%)      |

|                                                               |                |                 |                 |
|---------------------------------------------------------------|----------------|-----------------|-----------------|
| <b>Diabetes mellitus type 2</b>                               | 324 (0.007%)   | 1,464 (0.004%)  | 1,788 (0.004%)  |
| <b>Digestive congenital anomalies</b>                         | 1,091 (0.022%) | 10,526 (0.028%) | 11,617 (0.027%) |
| <b>Diseases of middle ear and mastoid except otitis media</b> | 2,454 (0.050%) | 25,850 (0.068%) | 28,304 (0.065%) |
| <b>Diseases of white blood cells</b>                          | 1,300 (0.026%) | 8,355 (0.022%)  | 9,655 (0.022%)  |
| <b>Disorders of jaw</b>                                       | 136 (0.003%)   | 1,012 (0.003%)  | 1,148 (0.003%)  |
| <b>Disorders of lipid metabolism</b>                          | 1,314 (0.027%) | 6,310 (0.016%)  | 7,624 (0.018%)  |
| <b>Dysautonomia</b>                                           | 198 (0.004%)   | 1,693 (0.004%)  | 1,891 (0.004%)  |
| <b>Esophageal disorders</b>                                   | 4,929 (0.100%) | 38,172 (0.100%) | 43,101 (0.100%) |
| <b>Feeding and eating disorders</b>                           | 466 (0.009%)   | 3,662 (0.010%)  | 4,128 (0.010%)  |
| <b>Gender dysphoria</b>                                       | 101 (0.002%)   | 1,346 (0.004%)  | 1,447 (0.003%)  |
| <b>Genitourinary congenital anomalies</b>                     | 2,049 (0.041%) | 23,430 (0.061%) | 25,479 (0.059%) |
| <b>Glaucoma</b>                                               | 123 (0.002%)   | 916 (0.002%)    | 1,039 (0.002%)  |
| <b>Hallucinations</b>                                         | 166 (0.003%)   | 1,124 (0.003%)  | 1,290 (0.003%)  |
| <b>Hearing loss</b>                                           | 2,632 (0.053%) | 25,042 (0.065%) | 27,674 (0.064%) |
| <b>Heart failure</b>                                          | 215 (0.004%)   | 1,721 (0.004%)  | 1,936 (0.004%)  |
| <b>Hypertension</b>                                           | 1,080 (0.022%) | 6,628 (0.017%)  | 7,708 (0.018%)  |
| <b>Hypothyroidism</b>                                         | 526 (0.011%)   | 4,323 (0.011%)  | 4,849 (0.011%)  |
| <b>Immunity disorders</b>                                     | 951 (0.019%)   | 5,930 (0.015%)  | 6,881 (0.016%)  |
| <b>Implant device or graft related encounter</b>              | 5,625 (0.114%) | 48,012 (0.125%) | 53,637 (0.124%) |
| <b>Intellectual disability</b>                                | 704 (0.014%)   | 5,141 (0.013%)  | 5,845 (0.014%)  |
| <b>Juvenile arthritis</b>                                     | 184 (0.004%)   | 1,485 (0.004%)  | 1,669 (0.004%)  |
| <b>Leukemia</b>                                               | 316 (0.006%)   | 1,561 (0.004%)  | 1,877 (0.004%)  |
| <b>Major depression</b>                                       | 1,052 (0.021%) | 6,385 (0.017%)  | 7,437 (0.017%)  |
| <b>Mental health treatment</b>                                | 4,094 (0.083%) | 20,740 (0.054%) | 24,834 (0.057%) |
| <b>Minor depression</b>                                       | 2,444 (0.049%) | 14,876 (0.039%) | 17,320 (0.040%) |
| <b>Muscle disorders</b>                                       | 3,259 (0.066%) | 22,847 (0.060%) | 26,106 (0.060%) |
| <b>Musculoskeletal congenital conditions</b>                  | 3,823 (0.077%) | 35,625 (0.093%) | 39,448 (0.091%) |
| <b>Myopathies</b>                                             | 137 (0.003%)   | 1,504 (0.004%)  | 1,641 (0.004%)  |
| <b>Nephritis and nephrosis</b>                                | 174 (0.004%)   | 942 (0.002%)    | 1,116 (0.003%)  |
| <b>Nerve and nerve root disorders</b>                         | 269 (0.005%)   | 2,123 (0.006%)  | 2,392 (0.006%)  |
| <b>Nervous system cancers</b>                                 | 162 (0.003%)   | 1,761 (0.005%)  | 1,923 (0.004%)  |
| <b>Nervous system congenital anomalies</b>                    | 1,046 (0.021%) | 10,142 (0.026%) | 11,188 (0.026%) |
| <b>Neuro ophthalmology</b>                                    | 794 (0.016%)   | 7,026 (0.018%)  | 7,820 (0.018%)  |
| <b>Neurocognitive disorders</b>                               | 193 (0.004%)   | 1,182 (0.003%)  | 1,375 (0.003%)  |
| <b>Neurodevelopmental disorders</b>                           | 2,656 (0.054%) | 15,547 (0.041%) | 18,203 (0.042%) |
| <b>Nonmalignant breast conditions</b>                         | 539 (0.011%)   | 2,728 (0.007%)  | 3,267 (0.008%)  |
| <b>Nonrheumatic and unspecified valve disorders</b>           | 537 (0.011%)   | 5,138 (0.013%)  | 5,675 (0.013%)  |
| <b>Obesity</b>                                                | 7,284 (0.147%) | 37,832 (0.099%) | 45,116 (0.104%) |
| <b>Obsessive compulsive and related disorders</b>             | 374 (0.008%)   | 2,582 (0.007%)  | 2,956 (0.007%)  |
| <b>Oppositional defiant disorder</b>                          | 691 (0.014%)   | 4,239 (0.011%)  | 4,930 (0.011%)  |
| <b>Organ transplant status</b>                                | 368 (0.007%)   | 2,683 (0.007%)  | 3,051 (0.007%)  |
| <b>Other and ill defined heart disease</b>                    | 636 (0.013%)   | 5,316 (0.014%)  | 5,952 (0.014%)  |



|                                                                           |                |                 |                 |
|---------------------------------------------------------------------------|----------------|-----------------|-----------------|
| <b>Other nervous system disorders</b>                                     | 1,143 (0.023%) | 10,968 (0.029%) | 12,111 (0.028%) |
| <b>Other nervous system disorders</b>                                     | 598 (0.012%)   | 4,940 (0.013%)  | 5,538 (0.013%)  |
| <b>Other specified and unspecified circulatory disease</b>                | 474 (0.010%)   | 4,243 (0.011%)  | 4,717 (0.011%)  |
| <b>Other specified and unspecified congenital anomalies</b>               | 1,923 (0.039%) | 17,215 (0.045%) | 19,138 (0.044%) |
| <b>Other specified and unspecified diseases of bladder and urethra</b>    | 516 (0.010%)   | 5,020 (0.013%)  | 5,536 (0.013%)  |
| <b>Other specified and unspecified diseases of kidney and ureters</b>     | 1,152 (0.023%) | 9,217 (0.024%)  | 10,369 (0.024%) |
| <b>Other specified and unspecified disorders of stomach and duoden</b>    | 489 (0.010%)   | 4,532 (0.012%)  | 5,021 (0.012%)  |
| <b>Other specified and unspecified endocrine disorders</b>                | 1,833 (0.037%) | 13,032 (0.034%) | 14,865 (0.034%) |
| <b>Other specified and unspecified gastrointestinal disorders</b>         | 1,302 (0.026%) | 11,303 (0.030%) | 12,605 (0.029%) |
| <b>Other specified and unspecified hematologic conditions</b>             | 458 (0.009%)   | 2,455 (0.006%)  | 2,913 (0.007%)  |
| <b>Other specified and unspecified liver disease</b>                      | 483 (0.010%)   | 3,284 (0.009%)  | 3,767 (0.009%)  |
| <b>Other specified and unspecified mood disorders</b>                     | 335 (0.007%)   | 1,960 (0.005%)  | 2,295 (0.005%)  |
| <b>Other specified and unspecified nutritional and metabolic disorder</b> | 2,345 (0.047%) | 15,535 (0.041%) | 17,880 (0.041%) |
| <b>Other specified bone disease and musculoskeletal deformities</b>       | 2,175 (0.044%) | 13,793 (0.036%) | 15,968 (0.037%) |
| <b>Other specified connective tissue disease</b>                          | 1,115 (0.023%) | 6,789 (0.018%)  | 7,904 (0.018%)  |
| <b>Other specified diseases of veins and lymphatics</b>                   | 565 (0.011%)   | 3,904 (0.010%)  | 4,469 (0.010%)  |
| <b>Other specified female genital disorders</b>                           | 1,694 (0.034%) | 9,415 (0.025%)  | 11,109 (0.026%) |
| <b>Other specified joint disorders</b>                                    | 2,257 (0.046%) | 15,494 (0.040%) | 17,751 (0.041%) |
| <b>Pancreatic disorders excluding diabetes</b>                            | 216 (0.004%)   | 1,663 (0.004%)  | 1,879 (0.004%)  |
| <b>Paralysis other than cerebral palsy</b>                                | 355 (0.007%)   | 3,534 (0.009%)  | 3,889 (0.009%)  |
| <b>Peripheral and visceral vascular disease</b>                           | 162 (0.003%)   | 1,183 (0.003%)  | 1,345 (0.003%)  |
| <b>Pituitary disorders</b>                                                | 378 (0.008%)   | 3,193 (0.008%)  | 3,571 (0.008%)  |
| <b>Polyneuropathies</b>                                                   | 226 (0.005%)   | 1,313 (0.003%)  | 1,539 (0.004%)  |
| <b>Psychological symptoms other</b>                                       | 3,253 (0.066%) | 20,686 (0.054%) | 23,939 (0.055%) |
| <b>Pulmonary heart disease</b>                                            | 365 (0.007%)   | 3,020 (0.008%)  | 3,385 (0.008%)  |
| <b>Refractive error</b>                                                   | 4,188 (0.085%) | 30,272 (0.079%) | 34,460 (0.080%) |
| <b>Regional enteritis and ulcerative colitis</b>                          | 280 (0.006%)   | 2,965 (0.008%)  | 3,245 (0.008%)  |
| <b>Respiratory congenital malformations</b>                               | 909 (0.018%)   | 7,503 (0.020%)  | 8,412 (0.019%)  |

|                                                                 |                |                 |                 |
|-----------------------------------------------------------------|----------------|-----------------|-----------------|
| <b>Retinal and vitreous conditions</b>                          | 626 (0.013%)   | 4,876 (0.013%)  | 5,502 (0.013%)  |
| <b>Scoliosis</b>                                                | 1,623 (0.033%) | 12,327 (0.032%) | 13,950 (0.032%) |
| <b>Seizures and epilepsy</b>                                    | 2,050 (0.041%) | 19,030 (0.050%) | 21,080 (0.049%) |
| <b>Sickle cell trait anemia</b>                                 | 528 (0.011%)   | 2,366 (0.006%)  | 2,894 (0.007%)  |
| <b>Sleep wake disorders</b>                                     | 5,722 (0.116%) | 47,911 (0.125%) | 53,633 (0.124%) |
| <b>Somatoform disorder</b>                                      | 494 (0.010%)   | 3,261 (0.009%)  | 3,755 (0.009%)  |
| <b>Spondylopathies<br/>spondyloarthropathy</b>                  | 2,019 (0.041%) | 13,591 (0.036%) | 15,610 (0.036%) |
| <b>Strabismus</b>                                               | 1,820 (0.037%) | 16,077 (0.042%) | 17,897 (0.041%) |
| <b>Systemic lupus and other connective<br/>tissue disorders</b> | 469 (0.009%)   | 2,763 (0.007%)  | 3,232 (0.007%)  |
| <b>Thyroid disorders</b>                                        | 218 (0.004%)   | 1,574 (0.004%)  | 1,792 (0.004%)  |
| <b>Tic disorder</b>                                             | 533 (0.011%)   | 4,166 (0.011%)  | 4,699 (0.011%)  |
| <b>Tobacco related disorders</b>                                | 156 (0.003%)   | 968 (0.003%)    | 1,124 (0.003%)  |
| <b>Trauma and stressor related<br/>disorders</b>                | 1,891 (0.038%) | 9,694 (0.025%)  | 11,585 (0.027%) |
| <b>Vesicoureteral reflux</b>                                    | 325 (0.007%)   | 2,827 (0.007%)  | 3,152 (0.007%)  |

## Note S2 Characterization of Patient Subpopulations

In **Figure 3** of the manuscript, we use a heatmap to depict the identification of patient subpopulations derived from Multi-Site Latent Class Analysis (MLCA). This heatmap illustrates the incidence of chronic conditions across various subpopulations: each column represents a subpopulation, while rows correspond to distinct clusters of chronic conditions. While **Figure 3** emphasizes the top 50 most common chronic conditions, **Figure S2** offers a broader view, showcasing the incidence rates for all chronic conditions across each subpopulation.

**Figure S2. Chronic condition incidence across identified subpopulations via Multi-Site Latent Class Analysis (MLCA). This heatmap displays the prevalence of chronic conditions across four distinct subpopulations (or latent classes). Columns represent individual subpopulations, while rows detail the incidence rates of specific chronic condition clusters.**

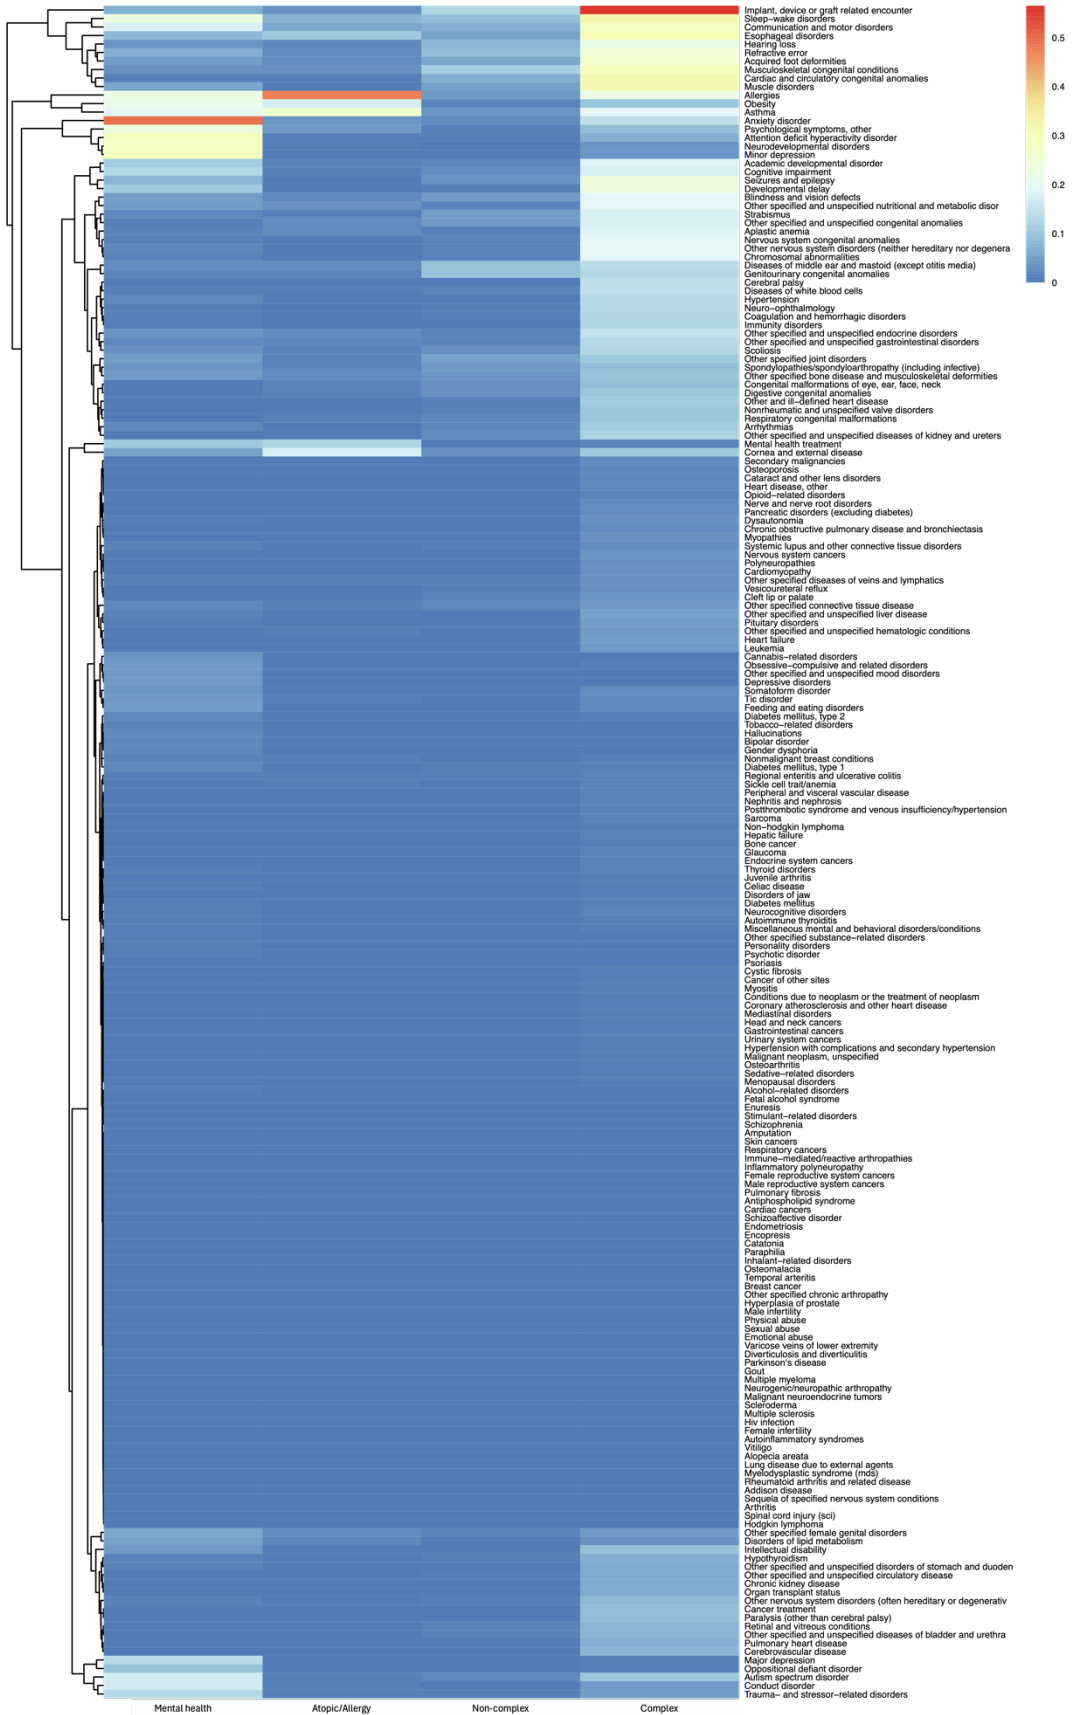

## Note S3 Causal Estimation of Baseline Healthcare Utilizations

To further elucidate the connection between identified patient subpopulations and healthcare utilization trends, we projected baseline healthcare usage patterns under the theoretical premise where all patients remained unaffected by COVID-19. As delineated in **Figure S3**, the incidence of inpatient visits exhibited significant variation across the four discerned subpopulations, averaging across all hospitals at rates of 3.5%, 1.5%, 1.8%, and 12.4% for classes 1 through 4, respectively. On the other hand, the ED visit rates sustained a level of uniformity, spanning an average range of 9.9% to 13.1% across the quartet of subpopulations. Remarkably, Class 4, which encapsulates children grappling with complex chronic conditions, marked the peak frequency in baseline inpatient and ED visits during a period unaffected by the COVID-19 pandemic.

**Figure S3. Hospital- and subpopulation-specific baseline healthcare utilization patterns. This figure illustrates the baseline patterns of inpatient (panel A) and ED (panel B) visits occurring between 28 and 179 days post-index date under the hypothetical scenario where all patients remained unaffected by SARS-CoV-2 infection.**

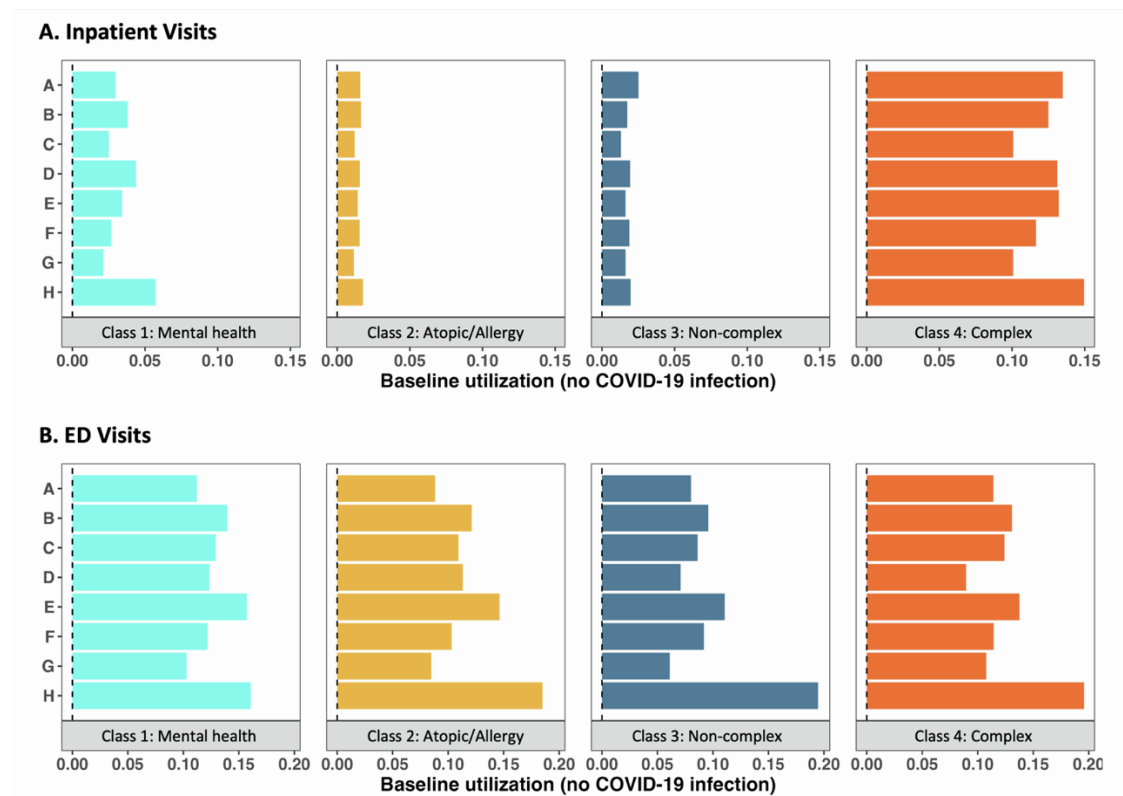

## Note S4 Negative Control Experiments

To mitigate potential biases originating from unmeasured confounders or systematic influences, we compiled a list of negative control outcomes. These outcomes, identified based on the ICD hierarchy<sup>3</sup>, are presumed not to be caused by COVID-19 infection (for a comprehensive list please refer to **Table S3**). After excluding exceedingly rare events in our database, 33 negative control outcome variables were incorporated in the analysis. By applying the same analytical strategy to this collection of negative control outcomes, we establish a baseline or "null" distribution, aiding in the accurate identification and correction of potential biases in estimating our primary outcomes of interest. The recalibrated estimates showcased in **Figure S4** indicate a minimal degree of systematic error, alongside a slight increase in uncertainty, as characterized by the distribution estimated from the negative control outcomes.

**Table S3. Negative control outcomes.**

| ICD-10-CM | Health conditions                                                                                         |
|-----------|-----------------------------------------------------------------------------------------------------------|
| H00-H06   | Disorders of eyelid, lacrimal system and orbit                                                            |
| H10-H13   | Disorders of conjunctiva                                                                                  |
| H15-H22   | Disorders of sclera, cornea, iris and ciliary body                                                        |
| H25-H28   | Disorders of lens                                                                                         |
| H30-H36   | Disorders of choroid and retina                                                                           |
| H40-H42   | Glaucoma                                                                                                  |
| H43-H45   | Disorders of vitreous body and globe                                                                      |
| H46-H48   | Disorders of optic nerve and visual pathways                                                              |
| H49-H52   | Disorders of ocular muscles, binocular movement, accommodation and refraction                             |
| H53-H54   | Visual disturbances and blindness                                                                         |
| H55-H59   | Other disorders of eye and adnexa                                                                         |
| H59-H59   | Intraoperative and postprocedural complications and disorders of eye and adnexa, not elsewhere classified |
| Q00-Q07   | Congenital malformations of the nervous system                                                            |
| Q10-Q18   | Congenital malformations of eye, ear, face and neck                                                       |
| Q20-Q28   | Congenital malformations of the circulatory system                                                        |
| Q38-Q45   | Other congenital malformations of the digestive system                                                    |
| Q50-Q56   | Congenital malformations of genital organs                                                                |
| Q60-Q64   | Congenital malformations of the urinary system                                                            |
| Q65-Q79   | Congenital malformations and deformations of the musculoskeletal system                                   |
| Q80-Q89   | Other congenital malformations                                                                            |
| Q90-Q99   | Chromosomal abnormalities, not elsewhere classified                                                       |
| S00-S09   | Injuries to the head                                                                                      |
| S10-S19   | Injuries to the neck                                                                                      |
| S20-S29   | Injuries to the thorax                                                                                    |
| S30-S39   | Injuries to the abdomen, lower back, lumbar spine and pelvis                                              |
| S40-S49   | Injuries to the shoulder and upper arm                                                                    |
| S50-S59   | Injuries to the elbow and forearm                                                                         |
| S60-S69   | Injuries to the wrist and hand                                                                            |
| S70-S79   | Injuries to the hip and thigh                                                                             |

|                |                                                                                         |
|----------------|-----------------------------------------------------------------------------------------|
| <b>S80-S89</b> | Injuries to the knee and lower leg                                                      |
| <b>S90-S99</b> | Injuries to the ankle and foot                                                          |
| <b>T00-T07</b> | Injuries involving multiple body regions                                                |
| <b>T08-T14</b> | Injuries to unspecified part of trunk, limb or body region                              |
| <b>T15-T19</b> | Effects of foreign body entering through natural orifice                                |
| <b>T20-T32</b> | Burns and corrosions                                                                    |
| <b>T33-T35</b> | Frostbite                                                                               |
| <b>T36-T50</b> | Poisoning by drugs, medicaments and biological substances                               |
| <b>T51-T65</b> | Toxic effects of substances chiefly nonmedicinal as to source                           |
| <b>T66-T78</b> | Other and unspecified effects of external causes                                        |
| <b>T79-T79</b> | Certain early complications of trauma                                                   |
| <b>T80-T88</b> | Complications of surgical and medical care, not elsewhere classified                    |
| <b>V00-V99</b> | Transport accidents                                                                     |
| <b>W00-W99</b> | Other external causes of accident injury I                                              |
| <b>X00-X59</b> | Other external causes of accident injury II                                             |
| <b>X60-X84</b> | Intentional self-harm                                                                   |
| <b>X85-X99</b> | Assault I                                                                               |
| <b>Y00-Y09</b> | Assault II                                                                              |
| <b>Y10-Y34</b> | Event of undetermined intent                                                            |
| <b>Y35-Y39</b> | Legal intervention and operations of war                                                |
| <b>Y40-Y84</b> | Complications of medical and surgical care                                              |
| <b>Y90-Y99</b> | Supplementary factors related to causes of morbidity and mortality classified elsewhere |

**Figure S4: Hospital- and subpopulation-specific COVID-19 effects on inpatient (panel A) and ED (panel B) visits after calibrating negative control outcomes.**

### A. Inpatient Visits

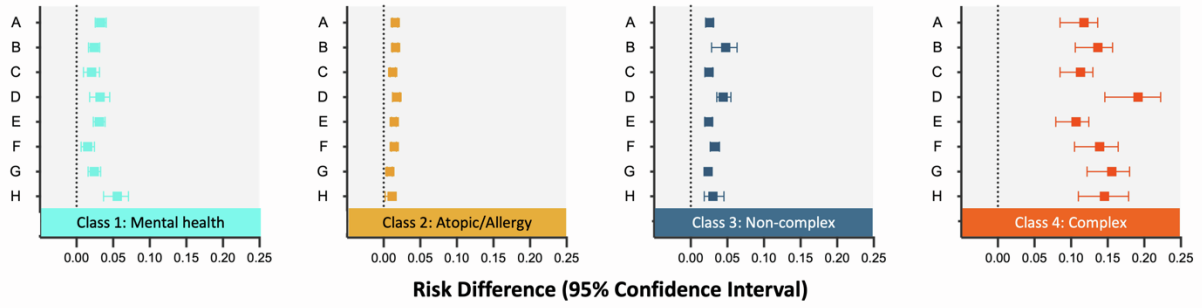

### B. ED Visits

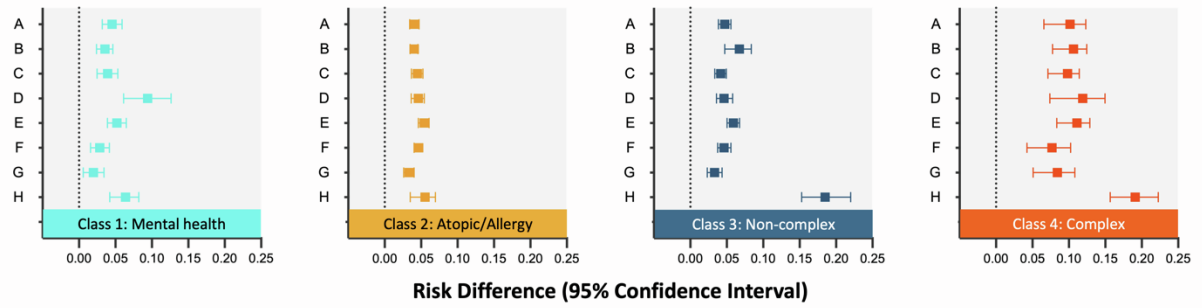



**Reference:**

1. Robins, J.M., Rotnitzky, A., and Zhao, L.P. (1994). Estimation of Regression Coefficients When Some Regressors are not Always Observed. *J Am Stat Assoc* 89, 846–866.  
<https://doi.org/10.1080/01621459.1994.10476818>.
2. Stefanski, L.A., and Boos, D.D. (2002). The Calculus of M-Estimation. *Am Stat* 56, 29–38.  
<https://doi.org/10.1198/000313002753631330>.
3. Hirsch, J.A., Nicola, G., McGinty, G., Liu, R.W., Barr, R.M., Chittle, M.D., and Manchikanti, L. (2016). ICD-10: History and Context. *American Journal of Neuroradiology* 37, 596.  
<https://doi.org/10.3174/ajnr.A4696>.
